# Supplementary material for: Enhanced In Vitro Plant Morphogenesis of Tobacco: Unveiling Indoleamine-Modulated Adaptogenic Properties of Tulsi (Ocimum sanctum L.)
Source: MDPI journal article supplement (doi:10.3390/plants13101370), 2024-05-15
Supplement: s1 [file s1]

**Table S1.** The effect of tulsi leaf extracts on the induction of regenerants, including organogenic shoots and somatic embryo-like structures in *N. tabacum* leaf explants. Values represent means  $\pm$  SEM, and different letters within the same column represent significant differences between treatments using the Tukey-HSD test ( $\alpha = 0.05$ ). P-values relative to the control treatment to determine if differences between the extract and control treatments were statistically significant.

| Treatment              | Average number of regenerants greater than 1 cm per explant | Adj.p (relative to control) |
|------------------------|-------------------------------------------------------------|-----------------------------|
| Control                | 6.14 $\pm$ 0.5 c                                            |                             |
| 1% Tulsi leaf extract  | 9.60 $\pm$ 0.5 bc                                           | <0.0001                     |
| 10% Tulsi leaf extract | 12.58 $\pm$ 0.5 ba                                          | <0.0001                     |
| 20% Tulsi leaf extract | 13.07 $\pm$ 0.5 a                                           | <0.0001                     |

**Table S2.** Adj P-values of various control and tulsi leaf extract treatments compared at day 10 and 25 *in vitro*.

| Treatment_day     | Adj.p values (Fresh weight concentration) |        |        |        |        |        |         |
|-------------------|-------------------------------------------|--------|--------|--------|--------|--------|---------|
|                   | TRP                                       | TRM    | 5-HTP  | SER    | NAS    | MEL    | 2-OHMEL |
| C_10 vs 20% hb_10 | 0.9477                                    | <.0001 | 0.7208 | 0.0527 | <.0001 | 0.9942 | 0.004   |
| C_25 vs 20% hb_25 | 1.0000                                    | 0.1535 | 0.1414 | 0.9717 | 0.2209 | 0.9986 | 0.6689  |

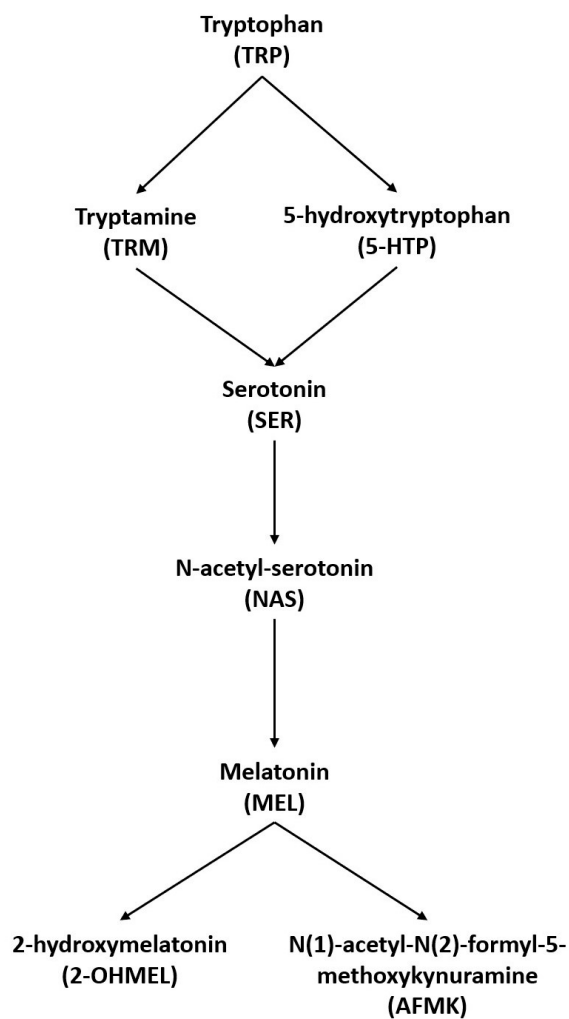

**Figure S1.** Schematic representation of the indoleamine pathway beginning with the precursor molecule tryptophan and ultimately converting into the downstream molecules 2-hydroxymelatonin and N(1)-acetyl-N(2)-formyl-5-methoxykynuramine [30,57].
